# Supplementary material for: Low Levels of Low-Density Lipoprotein Cholesterol Increase the Risk of Post-Thrombectomy Delayed Parenchymal Hematoma
Source: PubMed Central journal article supplement — Neurointervention. 2023 Aug 11;18(3):172–81. doi: 10.5469/neuroint.2023.00269 (PMC10626036; doi:10.5469/neuroint.2023.00269), 2023-08-11
Supplement: neuroint-2023-00269-Supplementary-Table-1.pdf [file neuroint-2023-00269-Supplementary-Table-1.pdf]

**Supplementary Table 1. Different thresholds of LDL-C in predicting post-thrombectomy delayed PH**

| LDL-C levels | OR   | 95% CI     | P-value |
|--------------|------|------------|---------|
| <30          | 2.71 | 0.26–27.99 | 0.400   |
| <40          | 5.64 | 0.83–19.54 | 0.061   |
| <50          | 5.68 | 1.70–15.04 | 0.004   |
| <60          | 2.11 | 0.72–6.18  | 0.170   |
| <70          | 1.66 | 0.60–4.64  | 0.326   |
| <80          | 1.47 | 0.55–3.97  | 0.440   |
| <90          | 2.27 | 0.80–6.44  | 0.120   |
| <100         | 3.81 | 1.05–13.90 | 0.043   |
| <110         | 3.51 | 0.76–16.13 | 0.104   |
| <120         | 1.89 | 0.41–8.84  | 0.413   |
| <130         | 2.81 | 0.35–22.66 | 0.328   |
| <140         | 1.73 | 0.21–14.27 | 0.610   |
| <150         | 1.16 | 0.14–9.88  | 0.892   |

LDL-C, low-density lipoprotein cholesterol; PH, parenchymal hematoma; OR, odds ratio; CI, confidence interval.
